# Supplementary material for: Effect of the Oral Administration of Common Evening Primrose Sprout (Oenothera biennis L.) Extract on Skin Function Improvement in UVB-irradiated Hairless Mice
Source: MDPI journal article supplement (doi:10.3390/ph14030222), 2021-03-06
Supplement: s1 [file s1]

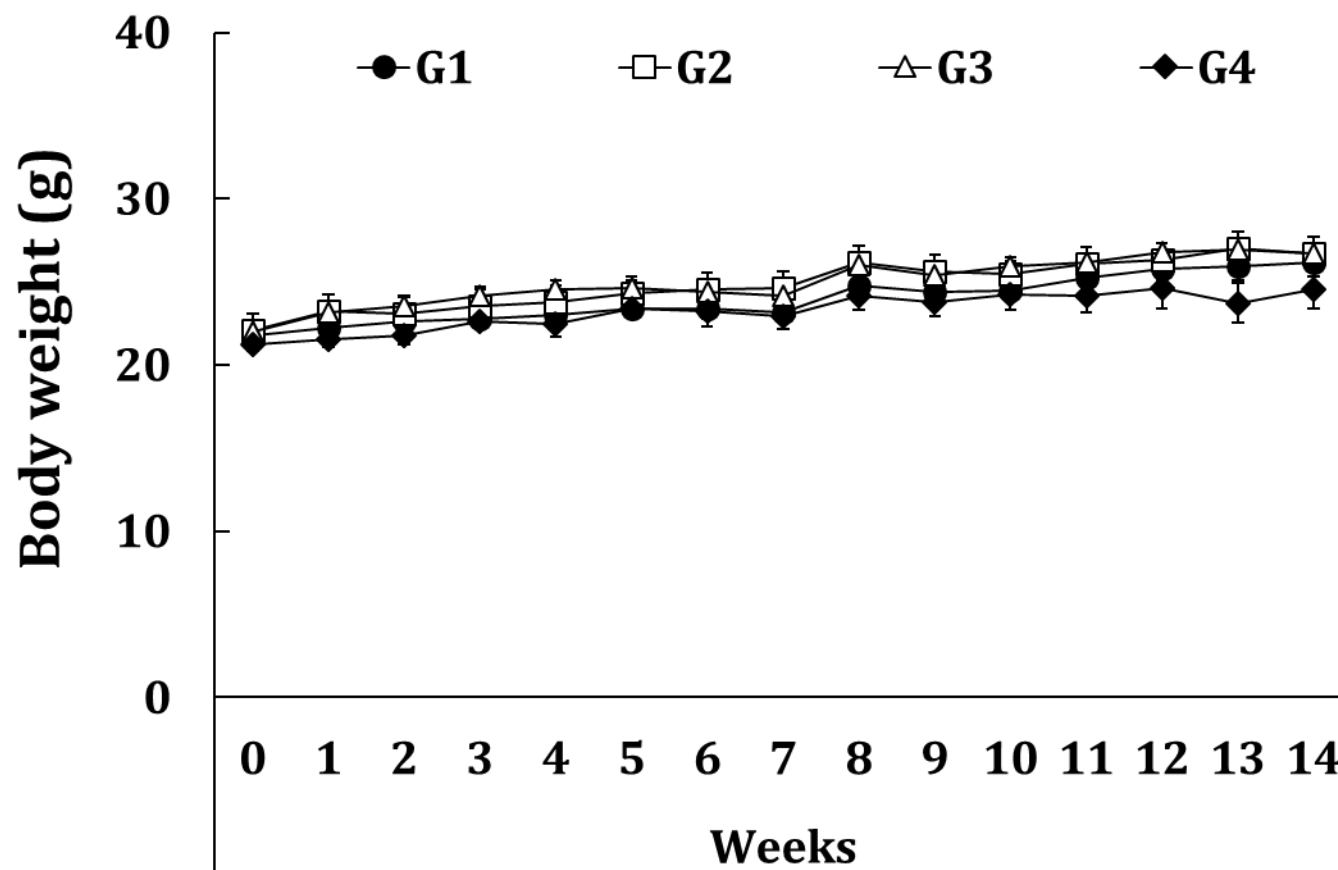

**Supplementary Figure 1.** Body weight changes in the experimental period. G1, non-irradiated control group administered saline; G2, UVB-irradiated control group administered saline; G3 and G4, UVB-irradiated test agent groups administered OBS-E at doses of 50 and 200 mg/kg BW/day, respectively
